# Supplementary material
Source: PubMed Central journal article supplement (PMC6343124)
Supplement: NIHMS1005270-supplement-1.pdf [file NIHMS1005270-supplement-1.pdf]

## Supplementary data

**Table S1.** BRFSS direct estimates of demographic characteristics (unadjusted) for up-to-date (within 2 years) mammography by NCHS metropolitan and nonmetropolitan county population size

| Characteristics | Metropolitan <sup>a</sup> |                                    |       |                                                  | Nonmetropolitan <sup>b</sup> |                           |       |                                   |
|-----------------|---------------------------|------------------------------------|-------|--------------------------------------------------|------------------------------|---------------------------|-------|-----------------------------------|
|                 | N                         | Population ≥1 million (% , 95% CI) | N     | Population ≥ 50,000 and < 1 million (% , 95% CI) | N                            | Micropolitan (% , 95% CI) | N     | Noncore (% , 95% CI)              |
| US Overall      | 45460                     | 79.97 (79.26, 80.65)               | 43757 | 78.26 (77.53, 78.97)                             | 20895                        | 75.95 (74.82, 77.04)      | 20147 | 72.61 (71.34, 73.83)              |
| Age group       |                           |                                    |       |                                                  |                              |                           |       |                                   |
| 50-54           | 8435                      | 77.84 (76.26, 79.34)               | 7743  | 75.54 (73.83, 77.17)                             | 3629                         | 72.84 (70.15, 75.38)      | 3429  | 68.60 (65.46, 71.58)              |
| 55-59           | 9370                      | 78.28 (76.65, 79.82)               | 8874  | 76.68 (75.08, 78.21)                             | 4345                         | 75.45 (72.98, 77.76)      | 4169  | 72.06 (69.24, 74.71)              |
| 60-64           | 10571                     | 80.57 (79.08, 81.97)               | 9927  | 78.85 (77.37, 80.27)                             | 4725                         | 74.72 (72.31, 76.98)      | 4647  | 71.98 (69.32, 74.50)              |
| 65-69           | 9368                      | 84.47 (83.15, 85.70)               | 9608  | 80.33 (78.76, 81.80)                             | 4468                         | 79.16 (76.73, 81.39)      | 4331  | 75.94 (73.41, 78.31)              |
| 70-74           | 7716                      | 80.74 (79.07, 92.30)               | 7605  | 82.14 (80.46, 83.70)                             | 3728                         | 79.77 (77.28, 82.05)      | 3573  | 76.54 (73.71, 79.15)              |
| Race/ethnicity  |                           |                                    |       |                                                  |                              |                           |       |                                   |
| NH white        | 34928                     | 78.83 (78.05, 79.58)               | 36269 | 78.11 (77.34, 78.85)                             | 18073                        | 76.48 (75.30, 77.62)      | 17687 | 72.49 (71.14, 73.81)              |
| NH black        | 5928                      | 84.11 (82.19, 85.85)               | 3031  | 83.11 (80.68, 85.28)                             | 1014                         | 81.81 (77.92, 85.13)      | 931   | 79.39 (75.27, 82.70)              |
| NH AIAN         | 297                       | 78.22 (69.47, 85.0)                | 484   | 69.06 (59.29, 77.38)                             | 388                          | 63.62 (52.96, 73.10)      | 687   | 73.63 (65.10, 80.69)              |
| NH Asian        | 511                       | 82.02 (76.27, 86.62)               | 618   | 84.08 (77.44, 89.04)                             | 169                          | 86.49 (75.07, 93.16)      | 32    | 57.40 <sup>c</sup> (30.48, 80.54) |
| Other NH race   | 807                       | 70.48 (63.67, 76.49)               | 1028  | 75.67 (68.57, 81.59)                             | 441                          | 74.13 (66.82, 80.31)      | 308   | 71.78 (62.43, 79.60)              |
| Hispanic        | 2420                      | 82.04 (79.35, 84.45)               | 1923  | 74.49 (70.52, 78.10)                             | 690                          | 58.31 (48.92, 67.12)      | 376   | 61.52 (50.37, 71.58)              |

<sup>a</sup> Metropolitan and <sup>b</sup> nonmetropolitan areas were based on the 2013 6 areas of NCHS urban-rural classification Scheme for counties (12):

1. Large central Metropolitan Statistical Areas (MSA) with population ≥1 million.
2. Large fringe MSA with population ≥1 million.
3. Medium metropolitan counties within MSAs of 250,000-999,999 population.
4. Small metropolitan counties within MSAs of 50,000-249,999 population (small metro).
5. Micropolitan counties with a city of 10,000 or more population).
6. Non-core (non-micropolitan) counties without a city of 10,000 or more population.

We collapsed the metropolitan areas to 2 areas based on population size:

<sup>a</sup> areas 1 (large central metro) and area 2 (large fringe metro); and areas 3 (medium metro) and area 4 (small metro). <sup>b</sup> Areas 5 and 6 remained the same.

n=sample size; Percentages are weighted to the study population; <sup>c</sup> Estimates should be treated with caution because the relative standard error (RSE)>30% or the sample size is small.

**Table S2.** BRFSS direct estimates of demographic characteristics (unadjusted) for rarely or never having had a mammogram (having the most recent mammogram  $\geq 5$  years before the survey interview or never having it) by NCHS metropolitan and nonmetropolitan county population size

| Characteristics | Metropolitan <sup>a</sup> |                                          |       |                                                         | Nonmetropolitan <sup>b</sup> |                           |       |                                  |
|-----------------|---------------------------|------------------------------------------|-------|---------------------------------------------------------|------------------------------|---------------------------|-------|----------------------------------|
|                 | N                         | Population $\geq 1$ million (% , 95% CI) | N     | Population $\geq 50,000$ and $< 1$ million (% , 95% CI) | N                            | Micropolitan (% , 95% CI) | N     | Noncore (% , 95% CI)             |
| US Overall      | 45460                     | 9.61 (9.13, 10.11)                       | 43757 | 11.48 (10.94, 12.05)                                    | 20895                        | 13.42 (12.57, 14.33)      | 20147 | 15.36 (14.38, 16.39)             |
| Age group       |                           |                                          |       |                                                         |                              |                           |       |                                  |
| 50-54           | 8435                      | 11.0 (9.94, 10.11)                       | 7743  | 13.41 (12.19, 14.74)                                    | 3629                         | 15.21 (13.22, 17.44)      | 3429  | 17.03 (14.72, 19.62)             |
| 55-59           | 9370                      | 10.07 (9.04, 11.20)                      | 8874  | 12.24 (11.07, 13.52)                                    | 4345                         | 14.28 (12.44, 16.34)      | 4169  | 15.85 (13.72, 18.25)             |
| 60-64           | 10571                     | 8.74 (7.82, 9.76)                        | 9927  | 10.73 ( 9.69, 11.87)                                    | 4725                         | 13.94 (12.21, 15.87)      | 4647  | 15.39 (13.46, 17.55)             |
| 65-69           | 9368                      | 7.96 (7.07, 8.94)                        | 9608  | 9.73 ( 8.65, 10.94)                                     | 4468                         | 10.97 (9.33, 12.86)       | 4331  | 13.38 (11.51, 15.51)             |
| 70-74           | 7716                      | 9.43 (8.31, 10.67)                       | 7605  | 10.21 ( 8.86, 11.73)                                    | 3728                         | 11.39 (9.63, 13.41)       | 3573  | 14.36 (12.27, 16.74)             |
| Race/ethnicity  |                           |                                          |       |                                                         |                              |                           |       |                                  |
| NH white        | 34928                     | 10.52 (9.97, 11.1)                       | 36269 | 11.56 (10.99, 12.16)                                    | 18073                        | 12.91 (12.04, 13.85)      | 17687 | 15.64 (14.58, 16.76)             |
| NH black        | 5928                      | 6.18 (5.21, 7.33)                        | 3031  | 8.67 (7.01, 10.67)                                      | 1014                         | 9.47 (7.23, 12.31)        | 931   | 10.43 (8.01, 13.46)              |
| NH AIAN         | 297                       | 8.87 (4.71, 16.07)                       | 484   | 17.32 (10.54, 27.12)                                    | 388                          | 25.57 (16.72, 37.02)      | 687   | 12.97 (8.32, 19.66)              |
| NH Asian        | 511                       | 8.24 (5.38, 12.41)                       | 618   | 8.62 (5.55, 13.16)                                      | 169                          | 5.65 (2.44, 12.55)        | 32    | 27.20 <sup>c</sup> (9.08, 58.30) |
| Other NH race   | 807                       | 18.34 (13.37, 24.63)                     | 1028  | 12.02 (8.73, 16.34)                                     | 441                          | 14.73 (10.34, 20.57)      | 308   | 14.32 (9.21, 21.60)              |
| Hispanic        | 2420                      | 7.89 (6.37, 9.74)                        | 1923  | 13.56 (10.78, 16.92)                                    | 690                          | 26.65 (19.43, 35.36)      | 376   | 19.62 (12.69, 29.06)             |

<sup>a</sup> Metropolitan and <sup>b</sup> nonmetropolitan areas were based on the 2013 6 areas of NCHS urban-rural classification Scheme for counties:

1. Large central Metropolitan Statistical Areas (MSA) with population  $\geq 1$  million.
2. Large fringe MSA with population  $\geq 1$  million.
3. Medium metropolitan counties within MSAs of 250,000-999,999 population.
4. Small metropolitan counties within MSAs of 50,000-249,999 population (small metro).
5. Micropolitan counties with a city of 10,000 or more population).
6. Non-core (non-micropolitan) counties without a city of 10,000 or more population.

We collapsed the metropolitan areas to 2 areas based on population size:

<sup>a</sup> areas 1 (large central metro) and area 2 (large fringe metro); and areas 3 (medium metro) and area 4 (small metro). <sup>b</sup> Areas 5 and 6 remained the same.

Percentages are weighted to the study population; <sup>c</sup> Estimates should be treated with caution because the relative standard error (RSE)>30% or the sample size is small.
