# Supplementary material
Source: PubMed Central journal article supplement (PMC6343124)
Supplement: NIHMS1005270-supplement-2.pdf [file NIHMS1005270-supplement-2.pdf]

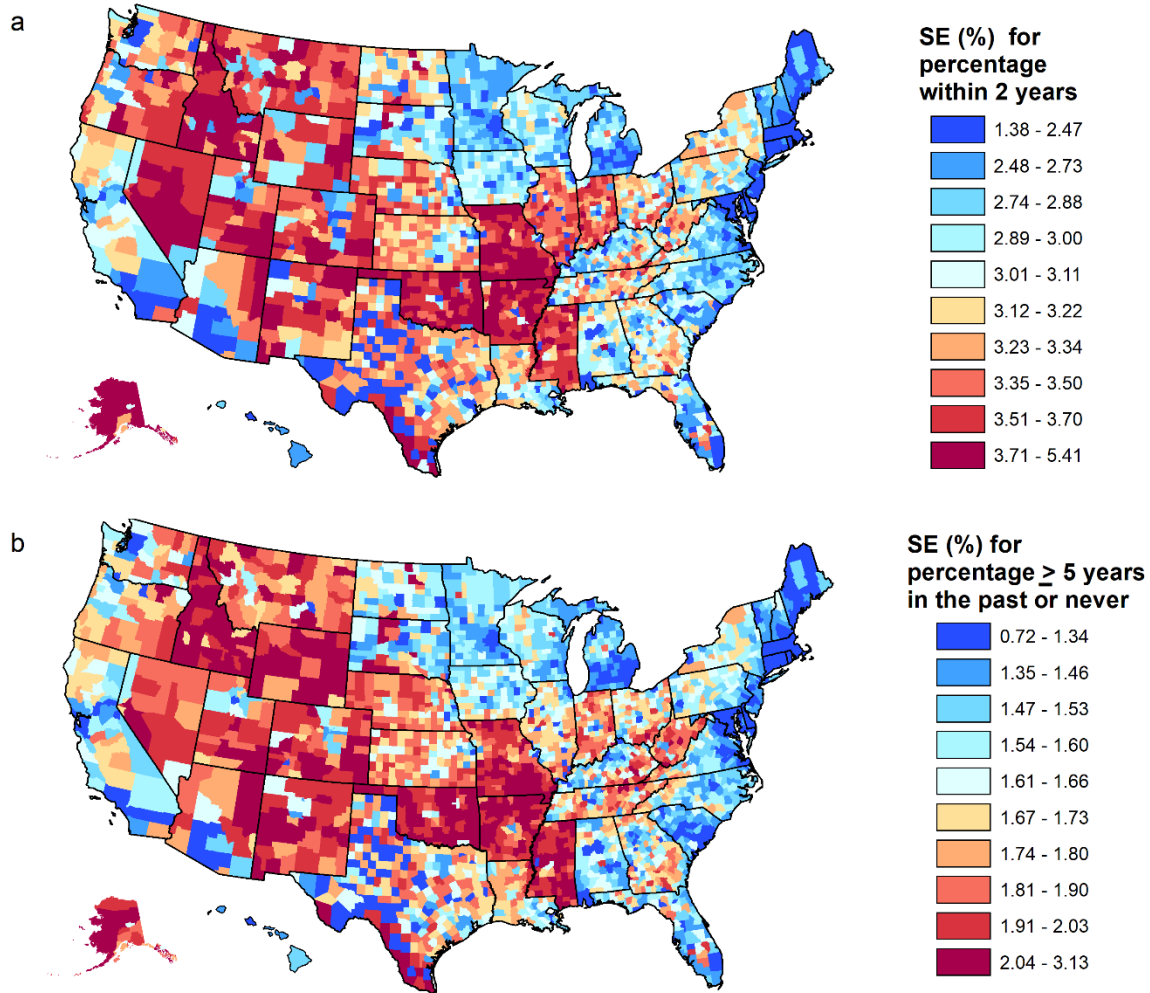

Supplementary Fig. S1. Model-based county-level mean estimates (%) of predicted standard errors of mammography use: a. being up-to-date (<2 years). b. rarely or never had a mammogram (having had a mammogram 5+ years in the past or never). The county percentage-ranges shown on the right were aggregated by deciles, and a different color was assigned in the legend to each decile.
